# Supplementary material for: Bioinformatics pipeline to guide late‐onset Alzheimer's disease (LOAD) post‐GWAS studies: Prioritizing transcription regulatory variants within LOAD‐associated regions
Source: PubMed Central journal article supplement — Alzheimers Dement (N Y). 2022 Feb 23;8(1):e12244. doi: 10.1002/trc2.12244 (PMC8864953; doi:10.1002/trc2.12244), 2022-02-23
Supplement: TRC2-8-e12244-s006.pdf [file TRC2-8-e12244-s006.pdf]

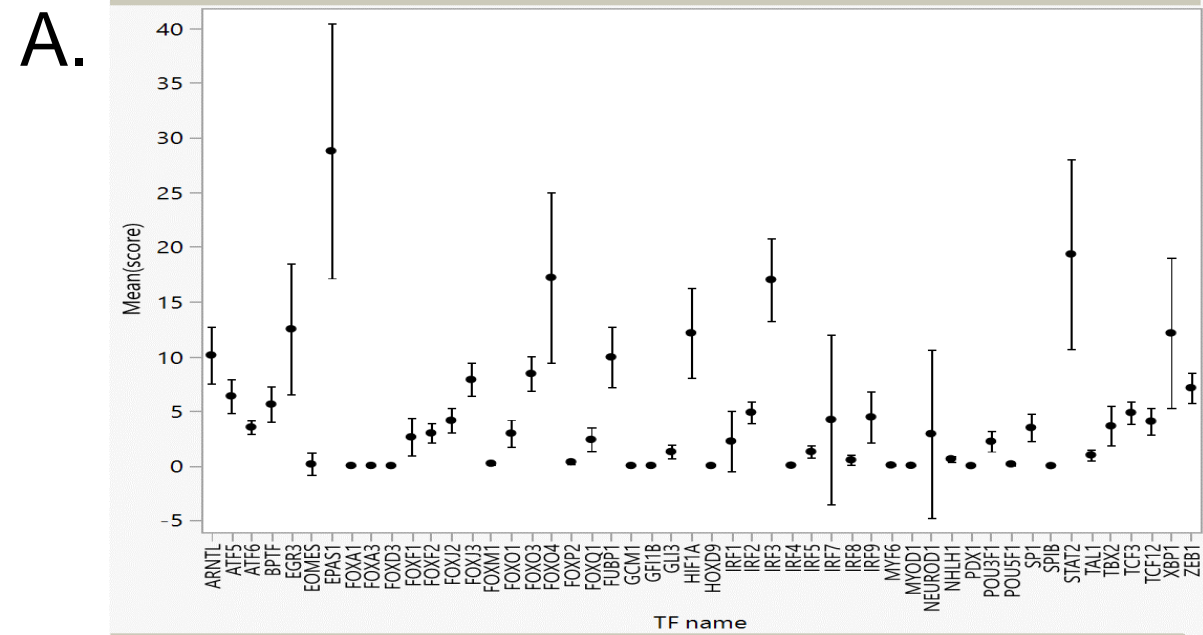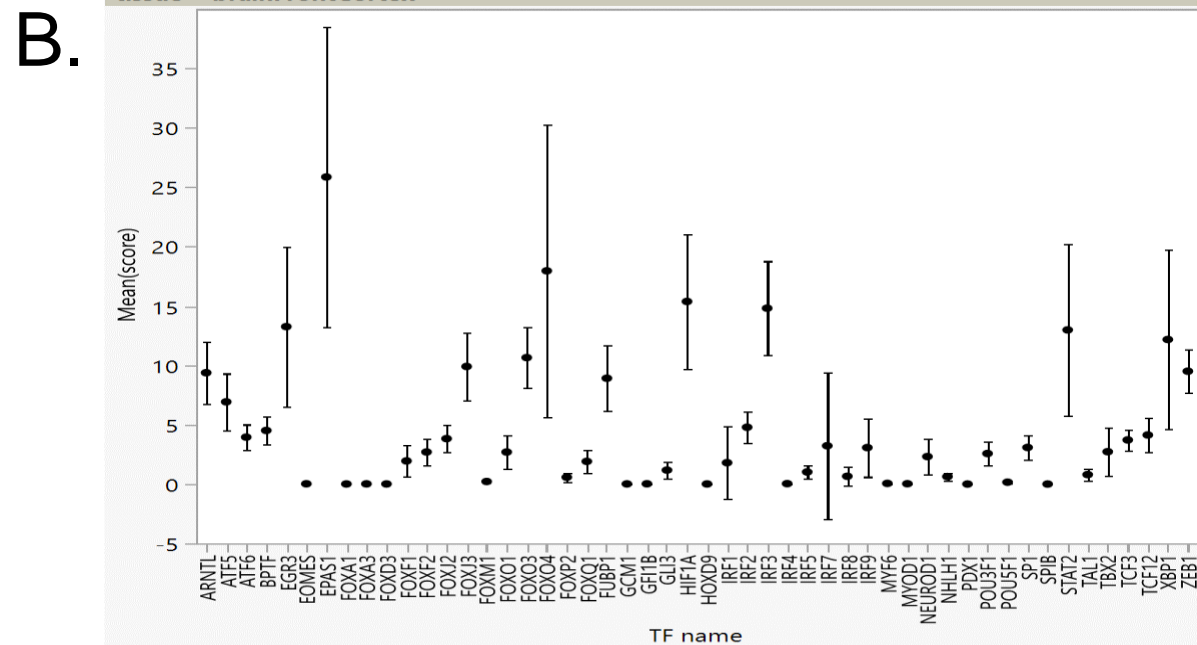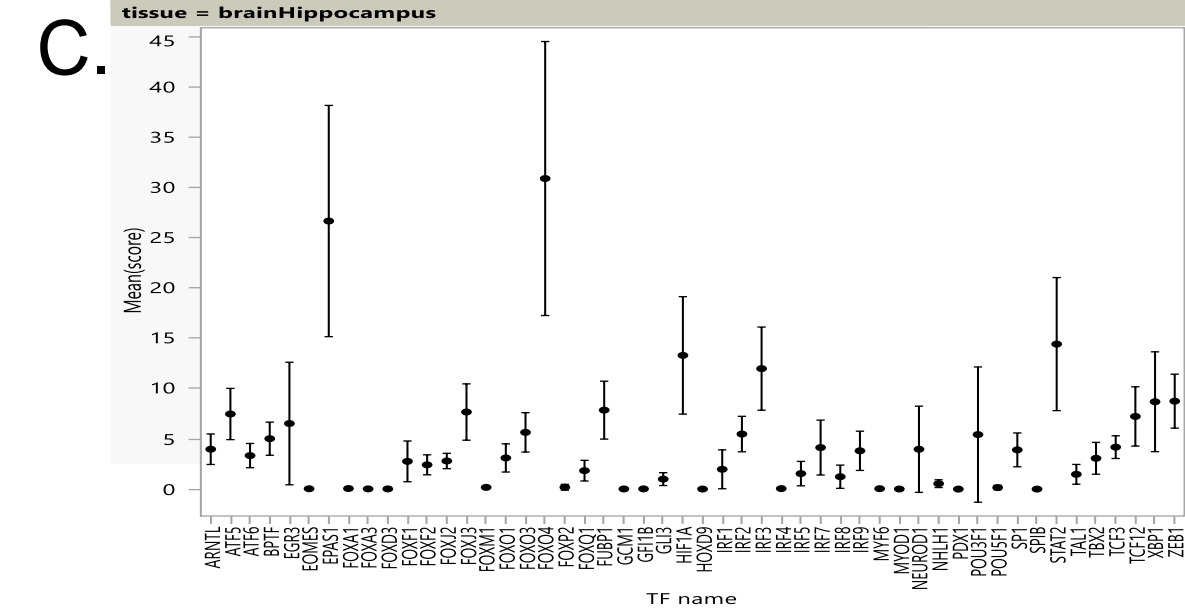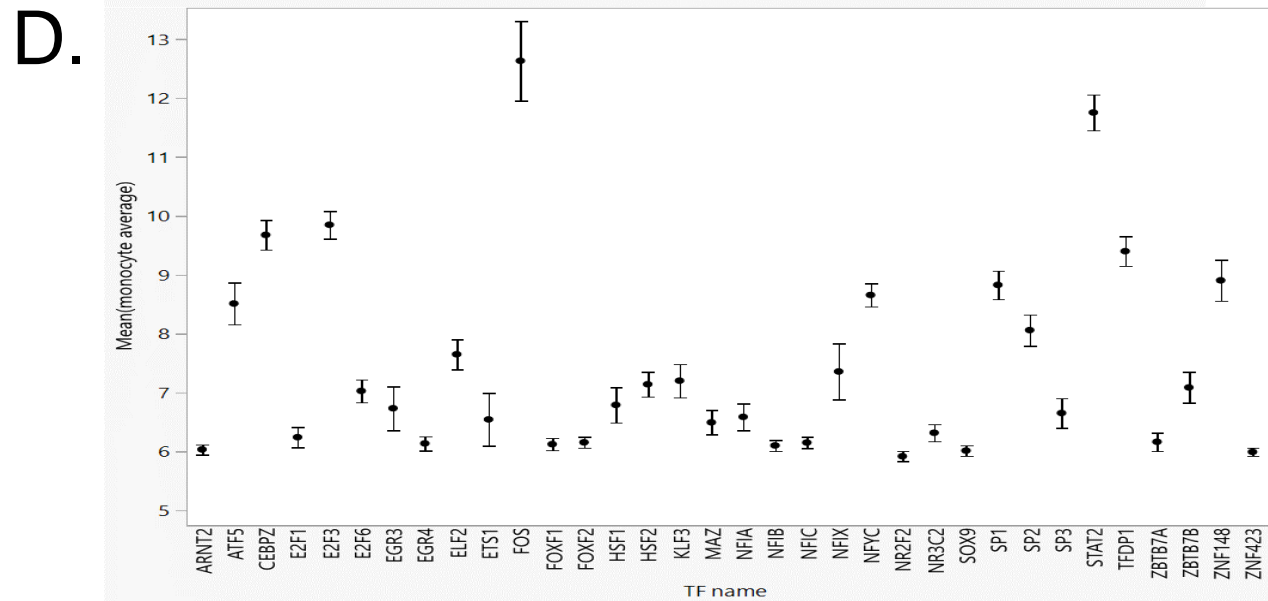

**Supplemental Figure S1.** Expression profiles of TFs in brain tissues and monocytes for all TFs considered in the pipeline analysis. Calculation of score is described in Methods. (A) Brain, Cortex, (B) Brain, Frontal Cortex, (C) Brain, Hippocampus, (D) Monocytes.
